# Supplementary material
Source: PubMed Central journal article supplement (PMC9487638)
Supplement: aac.00447-22-s0001.pdf [file aac.00447-22-s0001.pdf]

## **Supplementary tables :**

### Supplementary table 1:

Geographical distribution of KPC-2 and KPC-3 and their most frequent circulating variants. References used to generate the figure 1 are listed.

### Supplementary table 2:

Geographical distribution of CAZAVI-resistant KPC-2 and KPC-3 alleles. References used to generate figure 3 are listed.

### Supplementary table 3:

List of alleles of KPC involved in resistance to ceftazidime-avibactam including accession Number and references when available.

Supplementary table 1

| <b>Country</b>        | <b>KPC-variants</b>   | <b>References</b> | <b>Date of study/publication</b> |
|-----------------------|-----------------------|-------------------|----------------------------------|
| <b>Albania</b>        | KPC-3                 | (1)               | 2014                             |
| <b>Algeria</b>        | KPC-2, KPC-3          | (2)               | 2015-2017                        |
|                       |                       | (3)               | 2013                             |
| <b>Argentina</b>      | KPC-2, KPC-3          | (4)               | 2012-2014                        |
|                       |                       | (5)               | 2015-2017                        |
|                       |                       | (6)               | 2018                             |
| <b>Australia</b>      | KPC-2, KPC-3          | (7)               | 2009                             |
|                       |                       | (8)               | 2015                             |
| <b>Austria</b>        | KPC-2, KPC-3          | (4)               | 2012-2014                        |
|                       |                       | (9)               | 2013                             |
| <b>Brazil</b>         | KPC-2, KPC-3, KPC-30  | (4, 10)           | 2012-2014-2017                   |
|                       |                       | (11)              | 2013-2021                        |
| <b>Belgium</b>        | KPC-2, KPC-3          | (4, 10)           | 2012-2014                        |
| <b>Canada</b>         | KPC-2, KPC-3          | (12)              | 2012-2014                        |
|                       |                       | (13)              | 2013                             |
| <b>Chile</b>          | KPC-2                 | (4, 10)           | 2012-2014-2017                   |
| <b>China</b>          | KPC-2, KPC-12, KPC-33 | (4, 10)           | 2012-2014-2017                   |
|                       |                       | (14)              | 2020                             |
|                       |                       | (15)              | 2016                             |
|                       |                       | (14)              | 2016-2018                        |
|                       |                       | (16)              | 2017                             |
| <b>Colombia</b>       | KPC-2, KPC-3          | (4, 10)           | 2012-2014-2017                   |
|                       |                       | (17)              | 2006                             |
| <b>Croatia</b>        | KPC-2                 | (18)              | 2012-2014                        |
|                       |                       | (19)              | 2018-2019                        |
| <b>Czech Republic</b> | KPC-2, 3              | (4, 10)           | 2012-2014-2017                   |
|                       |                       | (20)              | 2018-2019                        |
| <b>Ecuador</b>        | KPC-2, KPC-4, KPC-5   | (21)              | 2019                             |
|                       |                       | (22)              | 2021                             |
| <b>Egypt</b>          | KPC-2                 | (23)              | 2017-2018                        |
| <b>France</b>         | KPC-2, KPC-3          | (24)              | 2016                             |
|                       |                       | (25)              | 2014                             |
| <b>Germany</b>        | KPC-2                 | (26)              | 2018                             |
|                       |                       | (4, 10)           | 2012-2014-2017                   |
| <b>Greece</b>         | KPC-2, KPC-3, KPC-9   | (4, 10)           | 2012-2014-2017                   |
|                       |                       | (27)              | 2016                             |
| <b>India</b>          | KPC-2                 | (28)              | 2018                             |
| <b>Israel</b>         | KPC-2, KPC-3, KPC-9   | (4, 10)           | 2012-2014-2017                   |
|                       |                       | (29)              | 2012                             |
| <b>Italy</b>          | KPC-2, KPC-3          | (4, 10)           | 2012-2014-2017                   |
|                       |                       | (30)              | 2017-2018                        |
| <b>Japan</b>          | KPC-2                 | (31)              | 2020                             |
|                       |                       | (4, 10)           | 2012-2014-2017                   |
| <b>Mexico</b>         | KPC-2, KPC-3          | (32)              | 2014                             |
|                       |                       | (33)              | 2010                             |
|                       |                       | (4, 10)           | 2012-2014-2017                   |
|                       |                       | (34)              | 2018                             |
| <b>Philippines</b>    | KPC-2                 | (4, 10)           | 2012-2014-2017                   |

---

|                              |                      |                                 |                                                       |
|------------------------------|----------------------|---------------------------------|-------------------------------------------------------|
|                              |                      | (35)                            | 2015-2018                                             |
| <b>Poland</b>                | KPC-2, KPC-3         | (36)<br>(37)<br>(38)            | 2010-2014<br>2008-2009<br>2020                        |
| <b>Puerto Rico</b>           | KPC-2, KPC-4, KPC-5  | (39)<br>(40)<br>(41)            | 2009<br>2009<br>2008                                  |
| <b>Portugal</b>              | KPC-2, KPC-3         | (4, 10)<br>(42)                 | 2012-2014-2017<br>2018-2019                           |
| <b>Romania</b>               | KPC-2                | (4, 10)<br>(43)                 | 2012-2014-2017<br>2011-2013                           |
| <b>Russia</b>                | KPC-2, KPC-3         | (44)<br>(4, 10)<br>(45)         | 2011<br>2012-2014-2017<br>2019                        |
| <b>South Korea</b>           | KPC-2, KPC-3, KPC-4  | (35)<br>(46)<br>(47)<br>(48)    | 2015-2018<br>2014-2015<br>2017<br>2013-2015           |
| <b>South Africa</b>          | KPC-2                | (49)<br>(50)                    | 2011<br>2019                                          |
| <b>Spain</b>                 | KPC-2, KPC-3         | (24)<br>(51)                    | 2016<br>2012-2014                                     |
| <b>Taiwan</b>                | KPC-2, KPC-17        | (4, 10)<br>(35)<br>(52)<br>(53) | 2012-2014-2017<br>2015-2018<br>2014-2015<br>2011-2013 |
| <b>United Kingdom</b>        | KPC-2, KPC-3, KPC-4  | (4, 10)<br>(54)                 | 2012-2014-2017<br>2016                                |
| <b>USA</b>                   | KPC-2, KPC-3, KPC-18 | (4, 10)<br>(55)<br>(56)<br>(57) | 2012-2014-2017<br>2020<br>2018<br>2018                |
| <b>Venezuela</b>             | KPC-2                | (4, 10)<br>(45)<br>(58)         | 2012-2014-2017<br>2014-2015<br>2012-2013              |
| <b>Vietnam</b>               | KPC-2                | (35)<br>(59)                    | 2015-2018<br>2010-2014                                |
| <b>Global view (reviews)</b> |                      | (60)<br>(61)<br>(62)            | 2014<br>2017<br>2011                                  |

---

1. Kostyanev T, Tafaj S, Skenduli I, Bardhi D, Kapiszyz P, Bino S, Lammens C, Goossens H. 2015. First detection of KPC-3-producing *Klebsiella pneumoniae* in Albania. *New Microbes New Infect* 4:11–12.
2. Brahmia S, Lalaoui R, Nedjai S, Djahmi N, Chettibi S, Rolain J-M, Bakour S. 2021. First Clinical Cases of KPC-2-Producing *Klebsiella pneumoniae* ST258 in Algeria and Outbreak of *Klebsiella pneumoniae* ST101 Harboring blaOXA-48 Gene in the Urology Department of Annaba Hospital. *Microb Drug Resist* 27:652–659.
3. Bakour S, Sahli F, Touati A, Rolain J-M. 2015. Emergence of KPC-producing *Klebsiella pneumoniae* ST512 isolated from cerebrospinal fluid of a child in Algeria. *New Microbes New Infect* 3:34–36.
4. Kazmierczak KM, Biedenbach DJ, Hackel M, Rabine S, de Jonge BLM, Bouchillon SK, Sahm DF, Bradford PA. 2016. Global Dissemination of blaKPC into Bacterial Species beyond *Klebsiella pneumoniae* and In Vitro Susceptibility to Ceftazidime-Avibactam and Aztreonam-Avibactam. *Antimicrob Agents Chemother* 60:4490–4500.
5. Cejas D, Elena A, Guevara Nuñez D, Sevillano Platero P, De Paulis A, Magariños F, Alfonso C, Berger MA, Fernández-Canigia L, Gutkind G, Radice M. 2019. Changing epidemiology of KPC-producing *Klebsiella pneumoniae* in Argentina: Emergence of hypermucoviscous ST25 and high-risk clone ST307. *J Glob Antimicrob Resist* 18:238–242.
6. Ghiglione B, Haim MS, Penzotti P, Brunetti F, D Amico González G, Di Conza J, Figueroa-Espinosa R, Nuñez L, Razzolini MTP, Fuga B, Esposito F, Vander Horden M, Lincopan N, Gutkind G, Power P, Droga M. 2021. Characterization of Emerging Pathogens Carrying bla KPC-2 Gene in IncP-6 Plasmids Isolated From Urban Sewage in Argentina. *Front Cell Infect Microbiol* 11:722536.
7. Coatsworth NR, Huntington PG, Hardiman RP, Hudson BJ, Fernandes CJ. 2012. A case of carbapenemase-producing *Klebsiella pneumoniae* in Australia. *Pathology* 44:42–44.
8. Partridge SR, Ginn AN, Wiklendt AM, Ellem J, Wong JSJ, Ingram P, Guy S, Garner S, Iredell JR. 2015. Emergence of blaKPC carbapenemase genes in Australia. *Int J Antimicrob Agents* 45:130–136.
9. Galler H, Feierl G, Petternel C, Reinthaler FF, Haas D, Grisold AJ, Luxner J, Zarfel G. 2014. KPC-2 and OXA-48 carbapenemase-harboring Enterobacteriaceae detected in an Austrian wastewater treatment plant. *Clin Microbiol Infect* 20:O132-134.
10. Kazmierczak KM, Karlowsky JA, de Jonge BLM, Stone GG, Sahm DF. 2021. Epidemiology of Carbapenem Resistance Determinants Identified in Meropenem-Nonsusceptible Enterobacterales Collected as Part of a Global Surveillance Program, 2012 to 2017. *Antimicrob Agents Chemother* 65:e0200020.
11. Migliorini LB, de Sales RO, Koga PCM, Doi AM, Poehlein A, Toniolo AR, Menezes FG, Martino MDV, Gales AC, Brüggemann H, Severino P. 2021. Prevalence of blaKPC-2, blaKPC-3 and blaKPC-30-Carrying Plasmids in *Klebsiella pneumoniae* Isolated in a Brazilian Hospital. *Pathogens* 10:332.
12. Walkty A, Alexander DC, Karlowsky JA, Nichol K, Embil J. 2019. Report of a KPC-producing *Pseudomonas aeruginosa* isolate in Canada. *J Antimicrob Chemother* 74:1748–1749.
13. Munoz-Price LS, Poirel L, Bonomo RA, Schwaber MJ, Daikos GL, Cormican M, Cornaglia G, Garau J, Gniadkowski M, Hayden MK, Kumarasamy K, Livermore DM, Maya JJ, Nordmann P, Patel JB, Paterson DL, Pitout J, Villegas MV, Wang H, Woodford N, Quinn JP. 2013. Clinical epidemiology of the global expansion of *Klebsiella pneumoniae* carbapenemases. *Lancet Infect Dis* 13:785–796.
14. Han R, Shi Q, Wu S, Yin D, Peng M, Dong D, Zheng Y, Guo Y, Zhang R, Hu F, China Antimicrobial Surveillance Network (CHINET) Study Group. 2020. Dissemination of Carbapenemases (KPC, NDM, OXA-48, IMP, and VIM) Among Carbapenem-Resistant Enterobacteriaceae Isolated From Adult and Children Patients in China. *Front Cell Infect Microbiol* 10:314.
15. Yang F, Huang L, Li L, Yang Y, Mao D, Luo Y. 2017. Discharge of KPC-2 genes from the WWTPs contributed to their enriched abundance in the receiving river. *Sci Total Environ* 581–582:136–143.
16. Zhang P, Shi Q, Hu H, Hong B, Wu X, Du X, Akova M, Yu Y. 2020. Emergence of ceftazidime/avibactam resistance in carbapenem-resistant *Klebsiella pneumoniae* in China. *Clin Microbiol Infect* 26:124.e1-124.e4.

17. Villegas MV, Lolans K, Correa A, Suarez CJ, Lopez JA, Vallejo M, Quinn JP, Colombian Nosocomial Resistance Study Group. 2006. First detection of the plasmid-mediated class A carbapenemase KPC-2 in clinical isolates of *Klebsiella pneumoniae* from South America. *Antimicrob Agents Chemother* 50:2880–2882.
18. Jelic M, Butic I, Plecko V, Cipris I, Jajic I, Bejuk D, Koscak I, Marinkovic S, Pal MP, Andrasevic AT. 2016. KPC-Producing *Klebsiella pneumoniae* Isolates in Croatia: A Nationwide Survey. *Microb Drug Resist* 22:662–667.
19. Wozniak A, Figueroa C, Moya-Flores F, Guggiana P, Castillo C, Rivas L, Munita JM, García PC. 2021. A multispecies outbreak of carbapenem-resistant bacteria harboring the blaKPC gene in a non-classical transposon element. *BMC Microbiol* 21:107.
20. Kraftova L, Finianos M, Studentova V, Chudejova K, Jakubu V, Zemlickova H, Papagiannitsis CC, Bitar I, Hrabak J. 2021. Evidence of an epidemic spread of KPC-producing Enterobacterales in Czech hospitals. *Sci Rep* 11:15732.
21. Prado-Vivar MB, Ortiz L, Reyes J, Villacis E, Fornasini M, Baldeon ME, Cardenas PA. 2019. Molecular typing of a large nosocomial outbreak of KPC-producing bacteria in the biggest tertiary-care hospital of Quito, Ecuador. *J Glob Antimicrob Resist* 19:328–332.
22. Reyes J, Cárdenas P, Tamayo R, Villavicencio F, Aguilar A, Melano RG, Trueba G. 2021. Characterization of blaKPC-2-Harboring *Klebsiella pneumoniae* Isolates and Mobile Genetic Elements from Outbreaks in a Hospital in Ecuador. *Microb Drug Resist* 27:752–759.
23. Ahmed MAE-GE-S, Yang Y, Yang Y, Yan B, Chen G, Hassan RM, Zhong L-L, Chen Y, Roberts AP, Wu Y, He R, Liang X, Qin M, Dai M, Zhang L, Li H, Yang F, Xu L, Tian G-B. 2021. Emergence of Hypervirulent Carbapenem-Resistant *Klebsiella pneumoniae* Coharboring a bla NDM-1-Carrying Virulent Plasmid and a bla KPC-2-Carrying Plasmid in an Egyptian Hospital. *mSphere* 6:e00088-21.
24. Girmenia C, Serrao A, Canichella M. 2016. Epidemiology of Carbapenem Resistant *Klebsiella pneumoniae* Infections in Mediterranean Countries. *Mediterr J Hematol Infect Dis* 8:e2016032.
25. Chen L, Mathema B, Chavda KD, DeLeo FR, Bonomo RA, Kreiswirth BN. 2014. Carbapenemase-producing *Klebsiella pneumoniae*: molecular and genetic decoding. *Trends Microbiol* 22:686–696.
26. Hagemann JB, Pfennigwerth N, Gatermann SG, von Baum H, Essig A. 2018. KPC-2 carbapenemase-producing *Pseudomonas aeruginosa* reaching Germany. *J Antimicrob Chemother* 73:1812–1814.
27. Karampatakis T, Antachopoulos C, Iosifidis E, Tsakris A, Roilides E. 2016. Molecular epidemiology of carbapenem-resistant *Klebsiella pneumoniae* in Greece. *Future Microbiol* 11:809–823.
28. Shankar C, Shankar BA, Manesh A, Veeraraghavan B. 2018. KPC-2 producing ST101 *Klebsiella pneumoniae* from bloodstream infection in India. *J Med Microbiol* 67:927–930.
29. Hidalgo-Grass C, Warburg G, Temper V, Benenson S, Moses AE, Block C, Strahilevitz J. 2012. KPC-9, a novel carbapenemase from clinical specimens in Israel. *Antimicrob Agents Chemother* 56:6057–6059.
30. Gaibani P, Re MC, Campoli C, Viale PL, Ambretti S. 2020. Bloodstream infection caused by KPC-producing *Klebsiella pneumoniae* resistant to ceftazidime/avibactam: epidemiology and genomic characterization. *Clin Microbiol Infect* 26:516.e1-516.e4.
31. Eda R, Maehana S, Hirabayashi A, Nakamura M, Furukawa T, Ikeda S, Sakai K, Kojima F, Sei K, Suzuki M, Kitasato H. 2021. Complete genome sequencing and comparative plasmid analysis of KPC-2-producing *Klebsiella pneumoniae* isolated from hospital sewage water in Japan. *J Glob Antimicrob Resist* 24:180–182.
32. Garza-Ramos U, Barrios H, Reyna-Flores F, Sánchez-Pérez A, Tamayo-Legorreta E, Ibarra-Pacheco A, Salazar-Salinas J, Núñez-Ceballos R, Silva-Sanchez J. 2014. Characteristics of KPC-2-producing *Klebsiella pneumoniae* (ST258) clinical isolates from outbreaks in 2 Mexican medical centers. *Diagn Microbiol Infect Dis* 79:483–485.
33. Rodríguez-Zulueta P, Silva-Sánchez J, Barrios H, Reyes-Mar J, Vélez-Pérez F, Arroyo-Escalante S, Ochoa-Carrera L, Delgado-Sapien G, Morales-Espinoza MDR, Tamayo-Legorreta E, Hernández-Castro R, Garza-Ramos U. 2013. First outbreak of KPC-3-producing *Klebsiella pneumoniae* (ST258) clinical isolates in a Mexican Medical Center. *Antimicrob Agents Chemother* 57:4086–4088.

34. Aquino-Andrade A, Merida-Vieyra J, Arias de la Garza E, Arzate-Barbosa P, De Colsa Ranero A. 2018. Carbapenemase-producing Enterobacteriaceae in Mexico: report of seven non-clonal cases in a pediatric hospital. *BMC Microbiol* 18:38.
35. Chen Y-C, Chen W-Y, Hsu W-Y, Tang H-J, Chou Y, Chang Y-H, Chen C-C, Chuang Y-C, Chang T-H. 2021. Distribution of  $\beta$ -lactamases and emergence of carbapenemases co-occurring Enterobacterales isolates with high-level antibiotic resistance identified from patients with intra-abdominal infection in the Asia-Pacific region, 2015-2018. *J Microbiol Immunol Infect* S1684-1182(21)00146-8.
36. Baraniak A, Izdebski R, Zabicka D, Bojarska K, Górska S, Literacka E, Fielt J, Hryniewicz W, Gniadkowski M, KPC-PL2 Study Group. 2017. Multiregional dissemination of KPC-producing *Klebsiella pneumoniae* ST258/ST512 genotypes in Poland, 2010-14. *J Antimicrob Chemother* 72:1610-1616.
37. Baraniak A, Izdebski R, Herda M, Fielt J, Hryniewicz W, Gniadkowski M, Kern-Zdanowicz I, Filczak K, Łopaciuk U. 2009. Emergence of *Klebsiella pneumoniae* ST258 with KPC-2 in Poland. *Antimicrob Agents Chemother* 53:4565-4567.
38. Kuch A, Zieniuk B, Żabicka D, Van de Velde S, Literacka E, Skoczyńska A, Hryniewicz W. 2020. Activity of temocillin against ESBL-, AmpC-, and/or KPC-producing Enterobacterales isolated in Poland. *Eur J Clin Microbiol Infect Dis* 39:1185-1191.
39. Wolter DJ, Khalaf N, Robledo IE, Vázquez GJ, Santé MI, Aquino EE, Goering RV, Hanson ND. 2009. Surveillance of carbapenem-resistant *Pseudomonas aeruginosa* isolates from Puerto Rican Medical Center Hospitals: dissemination of KPC and IMP-18 beta-lactamases. *Antimicrob Agents Chemother* 53:1660-1664.
40. Robledo IE, Aquino EE, Santé MI, Santana JL, Otero DM, León CF, Vázquez GJ. 2010. Detection of KPC in *Acinetobacter* spp. in Puerto Rico. *Antimicrob Agents Chemother* 54:1354-1357.
41. Wolter DJ, Kurpiel PM, Woodford N, Palepou M-FI, Goering RV, Hanson ND. 2009. Phenotypic and enzymatic comparative analysis of the novel KPC variant KPC-5 and its evolutionary variants, KPC-2 and KPC-4. *Antimicrob Agents Chemother* 53:557-562.
42. Lopes E, Saavedra MJ, Costa E, de Lencastre H, Poirel L, Aires-de-Sousa M. 2020. Epidemiology of carbapenemase-producing *Klebsiella pneumoniae* in northern Portugal: Predominance of KPC-2 and OXA-48. *J Glob Antimicrob Resist* 22:349-353.
43. Dortet L, Flonta M, Boudehen Y-M, Creton E, Bernabeu S, Vogel A, Naas T. 2015. Dissemination of carbapenemase-producing Enterobacteriaceae and *Pseudomonas aeruginosa* in Romania. *Antimicrob Agents Chemother* 59:7100-7103.
44. Ageevets V, Sopova J, Lazareva I, Malakhova M, Ilina E, Kostryukova E, Babenko V, Carattoli A, Lobzin Y, Uskov A, Sidorenko S. 2017. Genetic Environment of the blaKPC-2 Gene in a *Klebsiella pneumoniae* Isolate That May Have Been Imported to Russia from Southeast Asia. *Antimicrob Agents Chemother* 61:e01856-16.
45. Shamina OV, Kryzhanovskaya OA, Lazareva AV, Alyabieva NM, Polikarpova SV, Karaseva OV, Mayanskiy NA. 2020. Emergence of a ST307 clone carrying a novel insertion element MITEKpn1 in the mgrB gene among carbapenem-resistant *Klebsiella pneumoniae* from Moscow, Russia. *Int J Antimicrob Agents* 55:105850.
46. Song JE, Jeong H, Lim YS, Ha EJ, Jung IY, Jeong W, Choi H, Jeong SJ, Ku NS, Park ES, Yong D, Lee K, Kim JM, Choi JY. 2019. An Outbreak of KPC-Producing *Klebsiella pneumoniae* Linked with an Index Case of Community-Acquired KPC-Producing Isolate: Epidemiological Investigation and Whole Genome Sequencing Analysis. *Microb Drug Resist* 25:1475-1483.
47. Kim JO, Song SA, Yoon E-J, Shin JH, Lee H, Jeong SH, Lee K. 2017. Outbreak of KPC-2-producing Enterobacteriaceae caused by clonal dissemination of *Klebsiella pneumoniae* ST307 carrying an IncX3-type plasmid harboring a truncated Tn4401a. *Diagn Microbiol Infect Dis* 87:343-348.
48. Yoon E-J, Kim JO, Kim D, Lee H, Yang JW, Lee KJ, Jeong SH. 2018. *Klebsiella pneumoniae* Carbapenemase Producers in South Korea between 2013 and 2015. *Front Microbiol* 9:56.
49. Brink AJ, Coetsee J, Clay CG, Sithole S, Richards GA, Poirel L, Nordmann P. 2012. Emergence of New Delhi metallo-beta-lactamase (NDM-1) and *Klebsiella pneumoniae* carbapenemase (KPC-2) in South Africa. *J Clin Microbiol* 50:525-527.
50. Ekwanzala MD, Budeli P, Dewar JB, Kamika I, Momba MNB. 2019. Draft Genome Sequences of Novel Sequence Type 3559 Carbapenem-Resistant *Klebsiella pneumoniae* Isolates Recovered from the Environment. *Microbiol Resour Announc* 8:e00518-19.

51. Oteo J, Pérez-Vázquez M, Bautista V, Ortega A, Zamarrón P, Saez D, Fernández-Romero S, Lara N, Ramiro R, Aracil B, Campos J, Spanish Antibiotic Resistance Surveillance Program Collaborating Group. 2016. The spread of KPC-producing Enterobacteriaceae in Spain: WGS analysis of the emerging high-risk clones of *Klebsiella pneumoniae* ST11/KPC-2, ST101/KPC-2 and ST512/KPC-3. *J Antimicrob Chemother* 71:3392–3399.
52. Chen C-M, Guo M-K, Ke S-C, Lin Y-P, Li C-R, Vy Nguyen HT, Wu L-T. 2018. Emergence and nosocomial spread of ST11 carbapenem-resistant *Klebsiella pneumoniae* co-producing OXA-48 and KPC-2 in a regional hospital in Taiwan. *J Med Microbiol* 67:957–964.
53. Tseng I-L, Liu Y-M, Wang S-J, Yeh H-Y, Hsieh C-L, Lu H-L, Tseng Y-C, Mu J-J. 2015. Emergence of Carbapenemase Producing *Klebsiella pneumoniae* and Spread of KPC-2 and KPC-17 in Taiwan: A Nationwide Study from 2011 to 2013. *PLoS One* 10:e0138471.
54. Findlay J, Hopkins KL, Doumith M, Meunier D, Wiuff C, Hill R, Pike R, Loy R, Mustafa N, Livermore DM, Woodford N. 2016. KPC enzymes in the UK: an analysis of the first 160 cases outside the North-West region. *J Antimicrob Chemother* 71:1199–1206.
55. Jimenez A, Abbo LM, Martinez O, Shukla B, Sposato K, Iovleva A, Fowler EL, McElheny CL, Doi Y. 2020. KPC-3-Producing *Serratia marcescens* Outbreak between Acute and Long-Term Care Facilities, Florida, USA. *Emerg Infect Dis* 26:2746–2750.
56. Porreca AM, Sullivan KV, Gallagher JC. 2018. The Epidemiology, Evolution, and Treatment of KPC-Producing Organisms. *Curr Infect Dis Rep* 20:13.
57. Thomson GK, Snyder JW, McElheny CL, Thomson KS, Doi Y. 2016. Coproduction of KPC-18 and VIM-1 Carbapenemases by *Enterobacter cloacae*: Implications for Newer  $\beta$ -Lactam- $\beta$ -Lactamase Inhibitor Combinations. *J Clin Microbiol* 54:791–794.
58. Falco Restrepo AD, Velásquez Nieves MA, Takiff H. 2017. Molecular characterization of KPC-producing *Klebsiella pneumoniae* isolated from patients in a Public Hospital in Caracas, Venezuela. *Enferm Infecc Microbiol Clin* 35:411–416.
59. Linh TD, Thu NH, Shibayama K, Suzuki M, Yoshida L, Thai PD, Anh DD, Duong TN, Trinh HS, Thom VP, Nga LTV, Phuong NTK, Thuyet BT, Walsh TR, Thanh LV, Bañuls A-L, van Doorn HR, Van Anh T, Hoang TH. 2021. Expansion of KPC-producing Enterobacteriales in four large hospitals in Hanoi, Vietnam. *J Glob Antimicrob Resist* 27:200–211.
60. Nordmann P, Poirel L. 2014. The difficult-to-control spread of carbapenemase producers among Enterobacteriaceae worldwide. *Clin Microbiol Infect* 20:821–830.
61. Logan LK, Weinstein RA. 2017. The Epidemiology of Carbapenem-Resistant Enterobacteriaceae: The Impact and Evolution of a Global Menace. *J Infect Dis* 215:S28–S36.
62. Nordmann P, Naas T, Poirel L. 2011. Global spread of Carbapenemase-producing Enterobacteriaceae. *Emerg Infect Dis* 17:1791–1798.





Supplementary table 2

| <b>Variant</b>       | <b>Country</b>  | <b>References</b> |
|----------------------|-----------------|-------------------|
| <b>KPC-8</b>         | Puerto-Rico     | (1)               |
| <b>KPC-14</b>        | USA             | (2)               |
| <b>KPC-25</b>        | USA             | (3)               |
| <b>KPC-29</b>        | Italy           | (4)               |
| <b>KPC-31</b>        | USA and Italy   | (5)               |
| <b>KPC-33</b>        | USA             | (3)               |
| <b>KPC-35</b>        | USA             | (6)               |
| <b>KPC-36</b>        | Italy           | (7)               |
| <b>KPC-39</b>        | France          | (8)               |
| <b>KPC-40</b>        | USA             | (9)               |
| <b>KPC-41</b>        | Switzerland     | (10)              |
| <b>KPC-44</b>        | Finland         | (11)              |
| <b>KPC-48</b>        | Spain           | (12)              |
| <b>KPC-49</b>        | Italy and Spain | (13)              |
| <b>KPC-50</b>        | Switzerland     | (14)              |
| <b>KPC-51</b>        | China           | (15)              |
| <b>KPC-52</b>        | China           | (15)              |
| <b>KPC-53</b>        | Italy           | (16)              |
| <b>KPC-57</b>        | Greece          | (17)              |
| <b>KPC-62 to 65</b>  | Italy           | (18)              |
| <b>KPC-66</b>        | Italy           | (19)              |
| <b>KPC-67 to 70</b>  | Italy           | (4)               |
| <b>KPC-71</b>        | China           | (20)              |
| <b>KPC-78</b>        | China           | (21)              |
| <b>KPC-82</b>        | USA             | (22)              |
| <b>KPC-90</b>        | China           | (23)              |
| <b>KPC-94 and 95</b> | Spain           | (24)              |
| <b>KPC-123</b>       | China           | (25)              |

## References :

1. Gregory CJ, Llata E, Stine N, Gould C, Santiago LM, Vazquez GJ, Robledo IE, Srinivasan A, Goering RV, Tomashek KM. 2010. Outbreak of carbapenem-resistant *Klebsiella pneumoniae* in Puerto Rico associated with a novel carbapenemase variant. *Infect Control Hosp Epidemiol* 31:476–484.
2. Niu S, Chavda KD, Wei J, Zou C, Marshall SH, Dhawan P, Wang D, Bonomo RA, Kreiswirth BN, Chen L. 2020. A Ceftazidime-Avibactam-Resistant and Carbapenem-Susceptible *Klebsiella pneumoniae* Strain Harboring bla KPC-14 Isolated in New York City. *mSphere* 5:e00775-20.
3. Haidar G, Clancy CJ, Shields RK, Hao B, Cheng S, Nguyen MH. 2017. Mutations in blaKPC-3 That Confer Ceftazidime-Avibactam Resistance Encode Novel KPC-3 Variants That Function as Extended-Spectrum  $\beta$ -Lactamases. *Antimicrob Agents Chemother* 61:e02534-16.
4. Carattoli A, Arcari G, Bibbolino G, Sacco F, Tomolillo D, Di Lella FM, Trancassini M, Faino L, Venditti M, Antonelli G, Raponi G. 2021. Evolutionary Trajectories toward Ceftazidime-Avibactam Resistance in *Klebsiella pneumoniae* Clinical Isolates. *Antimicrob Agents Chemother* 65:e0057421.
5. Antonelli A, Giani T, Di Pilato V, Riccobono E, Perriello G, Mencacci A, Rossolini GM. 2019. KPC-31 expressed in a ceftazidime/avibactam-resistant *Klebsiella pneumoniae* is associated with relevant detection issues. *J Antimicrob Chemother* 74:2464–2466.
6. Hemarajata P, Humphries RM. 2019. Ceftazidime/avibactam resistance associated with L169P mutation in the omega loop of KPC-2. *J Antimicrob Chemother* 74:1241–1243.
7. Gaibani P, Ambretti S, Campoli C, Viale P, Re MC. 2020. Genomic characterization of a *Klebsiella pneumoniae* ST1519 resistant to ceftazidime/avibactam carrying a novel KPC variant (KPC-36). *Int J Antimicrob Agents* 55:105816.
8. Jousset AB, Oueslati S, Emeraud C, Bonnin RA, Dortet L, Iorga BI, Naas T. 2021. KPC-39-Mediated Resistance to Ceftazidime-Avibactam in a *Klebsiella pneumoniae* ST307 Clinical Isolate. *Antimicrob Agents Chemother* 65:e0116021.
9. Munoz-Price LS, Reeme AE, Buchan BW, Mettus RT, Mustapha MM, Van Tyne D, Shields RK, Doi Y. 2019. Patient-to-Patient Transmission of *Klebsiella pneumoniae* Carbapenemase Variants with Reduced Ceftazidime-Avibactam Susceptibility. *Antimicrob Agents Chemother* 63:e00955-19.
10. Mueller L, Masseron A, Prod'Hom G, Galperine T, Greub G, Poirel L, Nordmann P. 2019. Phenotypic, biochemical and genetic analysis of KPC-41, a KPC-3 variant conferring resistance to ceftazidime-avibactam and exhibiting reduced carbapenemase activity. *Antimicrob Agents Chemother* AAC.01111-19.
11. Räsänen K, Koivula I, Ilmavirta H, Puranen S, Kallonen T, Lyytikäinen O, Jalava J. 2019. Emergence of ceftazidime-avibactam-resistant *Klebsiella pneumoniae* during treatment, Finland, December 2018. *Euro Surveill* 24.
12. Cano Á, Guzmán-Puche J, García-Gutiérrez M, Castón JJ, Gracia-Ahufinger I, Pérez-Nadales E, Recio M, Natera AM, Marfil-Pérez E, Martínez-Martínez L, Torre-Cisneros J. 2020. Use of carbapenems in the combined treatment of emerging ceftazidime/avibactam-resistant and carbapenem-susceptible KPC-producing *Klebsiella pneumoniae* infections: Report of a case and review of the literature. *J Glob Antimicrob Resist* 22:9–12.
13. Hernández-García M, Sánchez-López J, Martínez-García L, Becerra-Aparicio F, Morosini MI, Ruiz-Garbajosa P, Cantón R. 2021. Emergence of the New KPC-49 Variant Conferring an ESBL Phenotype with Resistance to Ceftazidime-Avibactam in the ST131-H30R1 *Escherichia coli* High-Risk Clone. *Pathogens* 10:67.
14. Poirel L, Vuillemin X, Juhas M, Masseron A, Bechtel-Grosch U, Tiziani S, Mancini S, Nordmann P. 2020. KPC-50 Confers Resistance to Ceftazidime-Avibactam Associated with Reduced Carbapenemase Activity. *Antimicrob Agents Chemother* 64:e00321-20.
15. Sun L, Chen W, Li H, Li L, Zou X, Zhao J, Lu B, Li B, Wang C, Li H, Liu Y, Cao B. 2020. Phenotypic and genotypic analysis of KPC-51 and KPC-52, two novel KPC-2 variants conferring resistance to ceftazidime/avibactam in the KPC-producing *Klebsiella pneumoniae* ST11 clone background. *J Antimicrob Chemother* 75:3072–3074.
16. Di Pilato V, Aiezza N, Viaggi V, Antonelli A, Principe L, Giani T, Luzzaro F, Rossolini GM. 2020. KPC-53, a KPC-3 Variant of Clinical Origin Associated with Reduced Susceptibility to Ceftazidime-Avibactam. *Antimicrob Agents Chemother* 65:e01429-20.

17. Galani I, Karaiskos I, Angelidis E, Papoutsaki V, Galani L, Souli M, Antoniadou A, Giamarellou H. 2021. Emergence of ceftazidime-avibactam resistance through distinct genomic adaptations in KPC-2-producing *Klebsiella pneumoniae* of sequence type 39 during treatment. *Eur J Clin Microbiol Infect Dis* 40:219–224.
18. Venditti C, Butera O, Meledandri M, Balice MP, Cocciolillo GC, Fontana C, D'Arezzo S, De Giuli C, Antonini M, Capone A, Messina F, Nisii C, Di Caro A. 2021. Molecular analysis of clinical isolates of ceftazidime-avibactam-resistant *Klebsiella pneumoniae*. *Clin Microbiol Infect* 27:1040.e1-1040.e6.
19. Antinori E, Unali I, Bertocelli A, Mazzariol A. 2020. *Klebsiella pneumoniae* carbapenemase (KPC) producer resistant to ceftazidime-avibactam due to a deletion in the blaKPC3 gene. *Clin Microbiol Infect* 26:946.e1-946.e3.
20. Li X, Ke H, Wu W, Tu Y, Zhou H, Yu Y. 2021. Molecular Mechanisms Driving the In Vivo Development of KPC-71-Mediated Resistance to Ceftazidime-Avibactam during Treatment of Carbapenem-Resistant *Klebsiella pneumoniae* Infections. *mSphere* 6:e0085921.
21. Liao Q, Deng J, Feng Y, Zhang W, Wu S, Liu Y, Che H, Xie Y. 2022. Emergence of ceftazidime-avibactam resistance due to a novel blaKPC-2 mutation during treatment of carbapenem-resistant *Klebsiella pneumoniae* infections. *J Infect Public Health* 15:545–549.
22. Lebreton F, Corey BW, McElheny CL, Iovleva A, Preston L, Margulieux KR, Cybulski RJ, Mc Gann P, Doi Y, Bennett JW. 2021. Characterization of KPC-82, a KPC-2 Variant Conferring Resistance to Ceftazidime-Avibactam in a Carbapenem-Nonsusceptible Clinical Isolate of *Citrobacter koseri*. *Antimicrob Agents Chemother* 65:e0015021.
23. Tu Y, Wang D, Zhu Y, Li J, Jiang Y, Wu W, Li X, Zhou H. 2022. Emergence of a KPC-90 Variant that Confers Resistance to Ceftazidime-Avibactam in an ST463 Carbapenem-Resistant *Pseudomonas aeruginosa* Strain. *Microbiol Spectr* 10:e0186921.
24. Guzmán-Puche J, Pérez-Nadales E, Pérez-Vázquez M, Causse M, Gracia-Ahufinger I, Mendez-Natera A, Allalou-Ruiz Y, Elías C, Oteo-Iglesias J, Torre-Cisneros J, Martínez-Martínez L. 2022. In vivo selection of KPC-94 and KPC-95 in *Klebsiella pneumoniae* isolates from patients treated with ceftazidime/avibactam. *Int J Antimicrob Agents* 59:106524.
25. Wang L, Shen W, Zhang R, Cai J. 2022. Identification of a Novel Ceftazidime-Avibactam-Resistant KPC-2 Variant, KPC-123, in *Citrobacter koseri* Following Ceftazidime-Avibactam Treatment. *Front Microbiol* 13:930777.



Supplementary Table 3

| <b>KPC-variant<sup>a</sup></b> | <b>PMID</b> | <b>Accession Number</b> |
|--------------------------------|-------------|-------------------------|
| KPC-117*                       | NA          | UNN26047                |
| KPC-36                         | (1)         | MH593787.1              |
| KPC-49                         | (2)         | MN619655.1              |
| KPC-98*                        | NA          | UAZ57792.1              |
| KPC-53                         | (3)         | MUT87649.1              |
| KPC-40                         | (4)         | QRBR01000058.1          |
| KPC-25                         | (5)         | KU216748.1              |
| KPC-112*                       | NA          | UIY90578                |
| KPC-69                         | (6)         | QMU32012                |
| KPC-113*                       | NA          | ULU82276                |
| KPC-73*                        | NA          | QNC69633.1              |
| KPC-66                         | (6, 7)      | QNC69631.1              |
| KPC-94                         | (8)         | QYE52346.1              |
| KPC-35                         | (9)         | MH404098.1              |
| KPC-46*                        | NA          | MH450213.1              |
| KPC-48                         | (10)        | QEO76002                |
| KPC-62                         | (11)        | QKV50745.1              |
| KPC-115*                       | NA          | ULU82668                |
| KPC-72*                        | NA          | QNC69632.1              |
| KPC-39                         | (12)        | MK118771.1              |
| KPC-95                         | (8)         | QYE52347.1              |
| KPC-85*                        | NA          | QTV25836.1              |
| KPC-70                         | (6)         | QMU32028                |
| KPC-88*                        | NA          | QUR41144.1              |
| KPC-78*                        | NA          | QPO25385.1              |
| KPC-86*                        | NA          | QUR41142.1              |
| KPC-51                         | (13)        | QGT31448.1              |
| KPC-57                         | (14)        | QJD09264.1              |
| KPC-76*                        | NA          | QNT35811.1              |
| KPC-32*                        | NA          | MAPO01000050.1          |
| KPC-31                         | (15)        | MAPH01000113.1          |
| KPC-33                         | (5)         | CP025144.1              |
| KPC-90*                        | NA          | QWW21253.1              |
| KPC-65                         | (11)        | QKV50748.1              |
| KPC-52                         | (13)        | QGT31449.1              |
| KPC-68                         | (6)         | QMU31938                |
| KPC-114*                       | NA          | ULU82277                |
| KPC-71*                        | NA          | QOC63221.1              |
| KPC-64                         | (11)        | QKV50747.1              |
| KPC-123                        | (16)        | UNN26644                |
| KPC-107*                       | NA          | UFK32672.1              |
| KPC-108*                       | NA          | UFK32674.1              |
| KPC-104*                       | NA          | UFK32671.1              |
| KPC-106*                       | NA          | UFK32675.1              |
| KPC-74*                        | NA          | QMX41377.1              |
| KPC-23                         | (17)        | MH450213.1              |
| KPC-8                          | (18)        | FJ234412.1              |

|          |      |            |
|----------|------|------------|
| KPC-63   | (11) | QKV50746.1 |
| KPC-96*  | NA   | UAY85936.1 |
| KPC-28   | (19) | KY282958.1 |
| KPC-14   | (19) | JX524191.1 |
| KPC-87*  | NA   | QUR41143.1 |
| KPC-84*  | NA   | QSE38127.1 |
| KPC-44   | (20) | MK823188.1 |
| KPC-79*  | NA   | QPL19131.1 |
| KPC-105* | NA   | UFK32673.1 |
| KPC-58*  | NA   | QJX44695.1 |
| KPC-41   | (21) | QBC36180.1 |
| KPC-80*  | NA   | QQL91944.1 |
| KPC-29   | (6)  | KY563764.1 |
| KPC-67   | (6)  | QMU31921   |
| KPC-103* | NA   | UFK32670.1 |
| KPC-50   | (22) | QGJ02578.1 |
| KPC-82   | (23) | QQW39762.1 |
| KPC-97*  | NA   | UAY85937.1 |

<sup>a</sup>Variants indicated with a star correspond to variants unpublished, but indicated as resistant to CAZavi in the NCBI Nucleotide Database.

<sup>b</sup>NA : not applicable

## References

1. Gaibani P, Ambretti S, Campoli C, Viale P, Re MC. 2020. Genomic characterization of a *Klebsiella pneumoniae* ST1519 resistant to ceftazidime/avibactam carrying a novel KPC variant (KPC-36). *Int J Antimicrob Agents* 55:105816.
2. Hernández-García M, Sánchez-López J, Martínez-García L, Becerra-Aparicio F, Morosini MI, Ruiz-Garbajosa P, Cantón R. 2021. Emergence of the New KPC-49 Variant Conferring an ESBL Phenotype with Resistance to Ceftazidime-Avibactam in the ST131-H30R1 *Escherichia coli* High-Risk Clone. *Pathogens* 10:67.
3. Di Pilato V, Aiezza N, Viaggi V, Antonelli A, Principe L, Giani T, Luzzaro F, Rossolini GM. 2020. KPC-53, a KPC-3 Variant of Clinical Origin Associated with Reduced Susceptibility to Ceftazidime-Avibactam. *Antimicrob Agents Chemother* 65:e01429-20.
4. Munoz-Price LS, Reeme AE, Buchan BW, Mettus RT, Mustapha MM, Van Tyne D, Shields RK, Doi Y. 2019. Patient-to-Patient Transmission of *Klebsiella pneumoniae* Carbapenemase Variants with Reduced Ceftazidime-Avibactam Susceptibility. *Antimicrob Agents Chemother* 63:e00955-19.
5. Haidar G, Clancy CJ, Shields RK, Hao B, Cheng S, Nguyen MH. 2017. Mutations in blaKPC-3 That Confer Ceftazidime-Avibactam Resistance Encode Novel KPC-3 Variants That Function as Extended-Spectrum  $\beta$ -Lactamases. *Antimicrob Agents Chemother* 61:e02534-16.
6. Carattoli A, Arcari G, Bibbolino G, Sacco F, Tomolillo D, Di Lella FM, Trancassini M, Faino L, Venditti M, Antonelli G, Raponi G. 2021. Evolutionary Trajectories toward Ceftazidime-Avibactam Resistance in *Klebsiella pneumoniae* Clinical Isolates. *Antimicrob Agents Chemother* 65:e0057421.
7. Antinori E, Unali I, Bertonecelli A, Mazzariol A. 2020. *Klebsiella pneumoniae* carbapenemase (KPC) producer resistant to ceftazidime-avibactam due to a deletion in the blaKPC3 gene. *Clin Microbiol Infect* 26:946.e1-946.e3.
8. Guzmán-Puche J, Pérez-Nadales E, Pérez-Vázquez M, Causse M, Gracia-Ahufinger I, Mendez-Natera A, Allalou-Ruiz Y, Elías C, Oteo-Iglesias J, Torre-Cisneros J, Martínez-Martínez L. 2022. In vivo selection of KPC-94 and KPC-95 in *Klebsiella pneumoniae* isolates from patients treated with ceftazidime/avibactam. *Int J Antimicrob Agents* 59:106524.
9. Hemarajata P, Humphries RM. 2019. Ceftazidime/avibactam resistance associated with L169P mutation in the omega loop of KPC-2. *J Antimicrob Chemother* 74:1241–1243.
10. Cano Á, Guzmán-Puche J, García-Gutiérrez M, Castón JJ, Gracia-Ahufinger I, Pérez-Nadales E, Recio M, Natera AM, Marfil-Pérez E, Martínez-Martínez L, Torre-Cisneros J. 2020. Use of carbapenems in the combined treatment of emerging ceftazidime/avibactam-resistant and carbapenem-susceptible KPC-producing *Klebsiella pneumoniae* infections: Report of a case and review of the literature. *J Glob Antimicrob Resist* 22:9–12.
11. Venditti C, Butera O, Meledandri M, Balice MP, Cocciolillo GC, Fontana C, D'Arezzo S, De Giuli C, Antonini M, Capone A, Messina F, Nisii C, Di Caro A. 2021. Molecular analysis of clinical isolates of ceftazidime-avibactam-resistant *Klebsiella pneumoniae*. *Clin Microbiol Infect* 27:1040.e1-1040.e6.
12. Jousset AB, Oueslati S, Emeraud C, Bonnin RA, Dortet L, Iorga BI, Naas T. 2021. KPC-39-Mediated Resistance to Ceftazidime-Avibactam in a *Klebsiella pneumoniae* ST307 Clinical Isolate. *Antimicrob Agents Chemother* 65:e0116021.
13. Sun L, Chen W, Li H, Li L, Zou X, Zhao J, Lu B, Li B, Wang C, Li H, Liu Y, Cao B. 2020. Phenotypic and genotypic analysis of KPC-51 and KPC-52, two novel KPC-2 variants conferring resistance to ceftazidime/avibactam in the KPC-producing *Klebsiella pneumoniae* ST11 clone background. *J Antimicrob Chemother* 75:3072–3074.
14. Galani I, Karaiskos I, Angelidis E, Papoutsaki V, Galani L, Souli M, Antoniadou A, Giamarellou H. 2021. Emergence of ceftazidime-avibactam resistance through distinct genomic adaptations in KPC-2-producing *Klebsiella pneumoniae* of sequence type 39 during treatment. *Eur J Clin Microbiol Infect Dis* 40:219–224.

15. Antonelli A, Giani T, Di Pilato V, Riccobono E, Perriello G, Mencacci A, Rossolini GM. 2019. KPC-31 expressed in a ceftazidime/avibactam-resistant *Klebsiella pneumoniae* is associated with relevant detection issues. *J Antimicrob Chemother* 74:2464–2466.
16. Wang L, Shen W, Zhang R, Cai J. 2022. Identification of a Novel Ceftazidime-Avibactam-Resistant KPC-2 Variant, KPC-123, in *Citrobacter koseri* Following Ceftazidime-Avibactam Treatment. *Front Microbiol* 13:930777.
17. Galani I, Antoniadou A, Karaiskos I, Kontopoulou K, Giamarellou H, Souli M. 2019. Genomic characterization of a KPC-23-producing *Klebsiella pneumoniae* ST258 clinical isolate resistant to ceftazidime-avibactam. *Clin Microbiol Infect* 25:763.e5-763.e8.
18. Gregory CJ, Llata E, Stine N, Gould C, Santiago LM, Vazquez GJ, Robledo IE, Srinivasan A, Goering RV, Tomashek KM. 2010. Outbreak of carbapenem-resistant *Klebsiella pneumoniae* in Puerto Rico associated with a novel carbapenemase variant. *Infect Control Hosp Epidemiol* 31:476–484.
19. Oueslati S, Iorga BI, Tlili L, Exilie C, Zavala A, Dortet L, Jousset AB, Bernabeu S, Bonnin RA, Naas T. 2019. Unravelling ceftazidime/avibactam resistance of KPC-28, a KPC-2 variant lacking carbapenemase activity. *J Antimicrob Chemother* 74:2239–2246.
20. Räsänen K, Koivula I, Ilmavirta H, Puranen S, Kallonen T, Lyytikäinen O, Jalava J. 2019. Emergence of ceftazidime-avibactam-resistant *Klebsiella pneumoniae* during treatment, Finland, December 2018. *Euro Surveill* 24.
21. Mueller L, Masseron A, Prod'Hom G, Galperine T, Greub G, Poirel L, Nordmann P. 2019. Phenotypic, biochemical and genetic analysis of KPC-41, a KPC-3 variant conferring resistance to ceftazidime-avibactam and exhibiting reduced carbapenemase activity. *Antimicrob Agents Chemother* AAC.01111-19.
22. Poirel L, Vuillemin X, Juhas M, Masseron A, Bechtel-Grosch U, Tiziani S, Mancini S, Nordmann P. 2020. KPC-50 Confers Resistance to Ceftazidime-Avibactam Associated with Reduced Carbapenemase Activity. *Antimicrob Agents Chemother* 64:e00321-20.
23. Lebreton F, Corey BW, McElheny CL, Iovleva A, Preston L, Margulieux KR, Cybulski RJ, Mc Gann P, Doi Y, Bennett JW. 2021. Characterization of KPC-82, a KPC-2 Variant Conferring Resistance to Ceftazidime-Avibactam in a Carbapenem-Nonsusceptible Clinical Isolate of *Citrobacter koseri*. *Antimicrob Agents Chemother* 65:e0015021.
